# Supplementary material for: Effects of whole-grain cereals on fecal microbiota and short-chain fatty acids in dogs: a comparison of rye, oats and wheat
Source: PubMed Central journal article supplement (PMC10322915; doi:10.1038/s41598-023-37975-4), 2023-07-05
Supplement: 41598_2023_37975_MOESM1_ESM.pdf [file 41598_2023_37975_MOESM1_ESM.pdf]

## Effects of whole-grain cereals on fecal microbiota and short-chain fatty acids in dogs - A comparison of rye, oats and wheat

Hanna Palmqvist<sup>1</sup>, Katja Höglund<sup>2</sup>, Sara Ringmark<sup>2</sup>, Torbjörn Lundh<sup>1</sup> and Johan Dicksved<sup>1</sup>

<sup>1</sup> Department of Animal Nutrition and Management, Faculty of Veterinary Medicine and Animal Science, Swedish University of Agricultural Sciences, Uppsala, Sweden

<sup>2</sup> Department of Anatomy, Physiology and Biochemistry, Faculty of Veterinary Medicine and Animal Science, Swedish University of Agricultural Sciences, Uppsala, Sweden

**Supplementary Table S1:** Demographics of dogs participating in an experimental study on diets containing whole grain of rye, oats or wheat.

| Dog nr | Breed                              | Age (years) | Sex | Weight (kg) | BCS |
|--------|------------------------------------|-------------|-----|-------------|-----|
| 1      | Lagotto romagnolo                  | 9.7         | F   | 11.4        | 4   |
| 2      | Lagotto romagnolo                  | 5           | F   | 11.2        | 5   |
| 3      | Mixed breed                        | 8.4         | MC  | 41.5        | 5   |
| 4      | Mixed breed                        | 5.2         | MC  | 8.7         | 6   |
| 5      | Border Collie                      | 5.2         | F   | 15.2        | 5   |
| 6      | Lhasa Apso                         | 9.7         | MC  | 8.5         | 6   |
| 7      | Nederlandse Kooikerhondje          | 1.5         | M   | 9.9         | 5   |
| 8      | Poodle medium size                 | 8.1         | F   | 7.5         | 5   |
| 9      | Australian Kelpie                  | 4.5         | MC  | 18.9        | 5   |
| 10     | Weimaraner, short-haired           | 7.5         | FS  | 25.1        | 6   |
| 11     | Nova Scotia Duck Tolling Retriever | 2.6         | M   | 20.2        | 5   |
| 12     | Mixed breed                        | 3.2         | MC  | 29          | 4   |
| 13     | Whippet                            | 3.6         | FS  | 14.4        | 5   |
| 14     | Samoyed                            | 6.2         | F   | 29.4        | 5   |
| 15     | Mixed breed                        | 7.2         | F   | 30          | 6   |
| 16     | Labrador Retriever                 | 3           | FS  | 19.4        | 5   |
| 17     | Xoloitzcuintle                     | 3.4         | F   | 10          | 5   |
| 18     | Mixed breed                        | 8.4         | FS  | 20.7        | 6   |

Sex: F= female, FS= female spayed, M= male, MC= male castrated. BCS= body condition score.

**Supplementary Table S2.** Relative abundance, in % (means  $\pm$  SEM), of operational taxonomic units (OTU) with average relative abundance  $\geq$  0.1% and significant difference in main diet effect and genera with relative abundance  $\geq$  3% or significant difference in main diet effect.

| Phylum        | Family                | Genus                       | Species                           | Relative abundance           |                               |                              | <i>p</i> diet effect | <i>q</i> -value |
|---------------|-----------------------|-----------------------------|-----------------------------------|------------------------------|-------------------------------|------------------------------|----------------------|-----------------|
|               |                       |                             |                                   | Wheat diet                   | Oat diet                      | Rye diet                     |                      |                 |
| Firmicutes    |                       |                             |                                   |                              |                               |                              |                      |                 |
|               | Lachnospiraceae       |                             | Lachnospiraceae uncl.             | 0.37 $\pm$ 0.1 <sup>a</sup>  | 0.23 $\pm$ 0.04 <sup>ab</sup> | 0.18 $\pm$ 0.05 <sup>b</sup> | 0.0009               | 0.062           |
|               |                       |                             | Lachnospiraceae NK4A136 group     | 0.63 $\pm$ 0.1 <sup>a</sup>  | 0.41 $\pm$ 0.1 <sup>b</sup>   | 0.37 $\pm$ 0.1 <sup>b</sup>  | 0.008                | 0.16            |
|               |                       |                             | Lachnospiraceae NK4A136 group     | 0.57 $\pm$ 0.1 <sup>a</sup>  | 0.35 $\pm$ 0.1 <sup>b</sup>   | 0.31 $\pm$ 0.05 <sup>b</sup> | 0.005                | 0.14            |
|               |                       |                             | Coprococcus sp. HPP0074           | 1.5 $\pm$ 0.3 <sup>a</sup>   | 1.1 $\pm$ 0.2 <sup>ab</sup>   | 0.95 $\pm$ 0.2 <sup>b</sup>  | 0.028                | 0.20            |
|               |                       | Blautia                     |                                   | 5.6 $\pm$ 0.6                | 4.8 $\pm$ 0.8                 | 4.6 $\pm$ 0.6                | 0.10                 | 0.22            |
|               |                       |                             | Blautia uncl.                     | 1.9 $\pm$ 0.4 <sup>a</sup>   | 1.1 $\pm$ 0.2 <sup>b</sup>    | 1.2 $\pm$ 0.2 <sup>ab</sup>  | 0.013                | 0.15            |
|               |                       |                             | Blautia uncl.                     | 0.87 $\pm$ 0.1 <sup>a</sup>  | 0.56 $\pm$ 0.1 <sup>b</sup>   | 0.65 $\pm$ 0.1 <sup>ab</sup> | 0.035                | 0.20            |
|               | Veillonellaceae       | Megamonas                   |                                   | 2.9 $\pm$ 0.5                | 2.8 $\pm$ 0.6                 | 4.9 $\pm$ 1.0                | 0.046                | 0.22            |
|               |                       |                             | Megamonas uncl.                   | 2.8 $\pm$ 0.5                | 2.7 $\pm$ 0.6                 | 4.7 $\pm$ 0.9                | 0.044                | 0.22            |
|               | Erysipelotrichaceae   | Erysipelotrichaceae UCG-003 |                                   | 0.39 $\pm$ 0.2 <sup>a</sup>  | 1.3 $\pm$ 0.5 <sup>b</sup>    | 0.59 $\pm$ 0.3 <sup>ab</sup> | 0.014                | 0.19            |
|               |                       |                             | Erysipelotrichaceae UCG-003 uncl. | 0.39 $\pm$ 0.2 <sup>a</sup>  | 1.3 $\pm$ 0.5 <sup>b</sup>    | 0.58 $\pm$ 0.3 <sup>ab</sup> | 0.015                | 0.15            |
|               |                       | Catenibacterium             |                                   | 4.7 $\pm$ 1.6 <sup>a</sup>   | 8.7 $\pm$ 2.7 <sup>ab</sup>   | 9.4 $\pm$ 1.8 <sup>b</sup>   | 0.032                | 0.22            |
|               |                       |                             | Catenibacterium uncl.             | 4.6 $\pm$ 1.6 <sup>a</sup>   | 8.7 $\pm$ 2.7 <sup>ab</sup>   | 9.3 $\pm$ 1.7 <sup>b</sup>   | 0.033                | 0.20            |
|               | Peptostreptococcaceae | Peptoclostridium            |                                   | 8.4 $\pm$ 1.1                | 6.3 $\pm$ 1.1                 | 6.8 $\pm$ 1.2                | 0.08                 | 0.22            |
| Bacteroidetes |                       |                             |                                   |                              |                               |                              |                      |                 |
|               | Bacteroidaceae        | Bacteroides                 |                                   | 11.0 $\pm$ 0.9 <sup>a</sup>  | 11.8 $\pm$ 1.9 <sup>a</sup>   | 6.8 $\pm$ 1.2 <sup>b</sup>   | 0.003                | 0.11            |
|               |                       |                             | Bacteroides uncl.                 | 0.79 $\pm$ 0.3 <sup>a</sup>  | 0.23 $\pm$ 0.1 <sup>b</sup>   | 0.21 $\pm$ 0.1 <sup>b</sup>  | 0.006                | 0.14            |
|               |                       |                             | Bacteroides coprocola             | 0.64 $\pm$ 0.1 <sup>a</sup>  | 0.44 $\pm$ 0.1 <sup>ab</sup>  | 0.33 $\pm$ 0.1 <sup>b</sup>  | 0.014                | 0.15            |
|               |                       |                             | Bacteroides stercoris             | 0.87 $\pm$ 0.6 <sup>a</sup>  | 0.87 $\pm$ 0.6 <sup>ab</sup>  | 0.18 $\pm$ 0.04 <sup>b</sup> | 0.026                | 0.20            |
|               |                       |                             | Bacteroides vulgatus              | 0.85 $\pm$ 0.3 <sup>ab</sup> | 2.7 $\pm$ 1.3 <sup>a</sup>    | 0.29 $\pm$ 0.1 <sup>b</sup>  | 0.031                | 0.20            |
|               |                       |                             | Bacteroides caecigallinarum       | 0.30 $\pm$ 0.1 <sup>a</sup>  | 0.13 $\pm$ 0.03 <sup>ab</sup> | 0.06 $\pm$ 0.01 <sup>b</sup> | 0.04                 | 0.21            |
|               | Prevotellaceae        | Prevotella_9                |                                   | 11.4 $\pm$ 2.3               | 9.5 $\pm$ 2.2                 | 14.1 $\pm$ 3.0               | 0.098                | 0.22            |

|                |                  |                       |                      |                       |                      |       |      |
|----------------|------------------|-----------------------|----------------------|-----------------------|----------------------|-------|------|
|                |                  | Alloprevotella        | 3.6±0.5              | 4.7±1.0               | 3.7±0.7              | 0.81  | 0.93 |
| Fusobacteria   |                  |                       |                      |                       |                      |       |      |
|                | Fusobacteriaceae | Fusobacterium         | 13.7±1.9             | 14.5±2.0              | 13.4±2.7             | 0.58  | 0.70 |
|                |                  | Fusobacteriales uncl. | 7.0±1.3 <sup>a</sup> | 10.9±1.6 <sup>b</sup> | 6.0±1.2 <sup>a</sup> | 0.008 | 0.14 |
| Proteobacteria |                  |                       |                      |                       |                      |       |      |
|                | Alcaligenaceae   | Sutterella            | 3.2±0.5              | 3.0±0.6               | 4.4±0.9              | 0.20  | 0.34 |

Values on the same row without common superscript letters differ significantly ( $p < 0.05$ ) in post-hoc pairwise comparisons.  $q$ -value obtained from correction with false discovery rate (FDR) according to Benjamini-Hochberg.
